# Supplementary material
Source: PubMed Central journal article supplement (PMC3636178)

Supplementary Figure 1a

Higher exposure

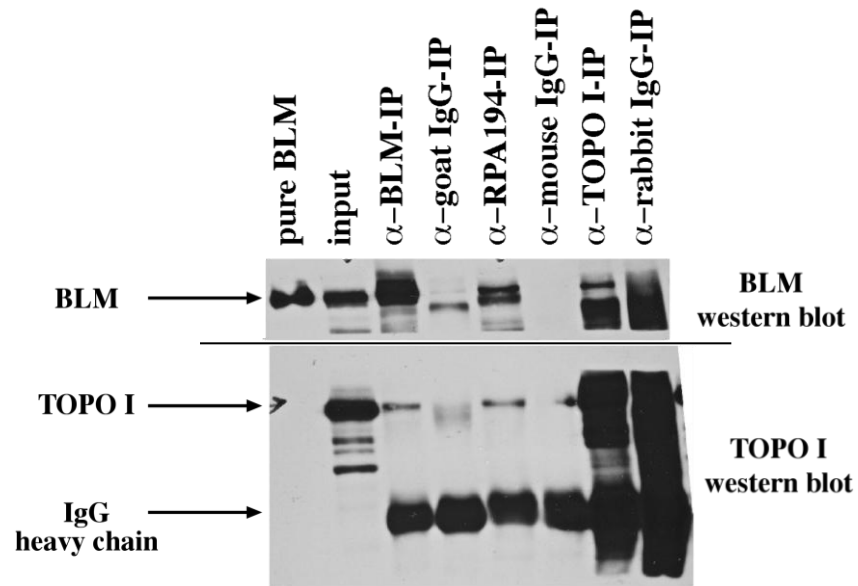

Lower exposure

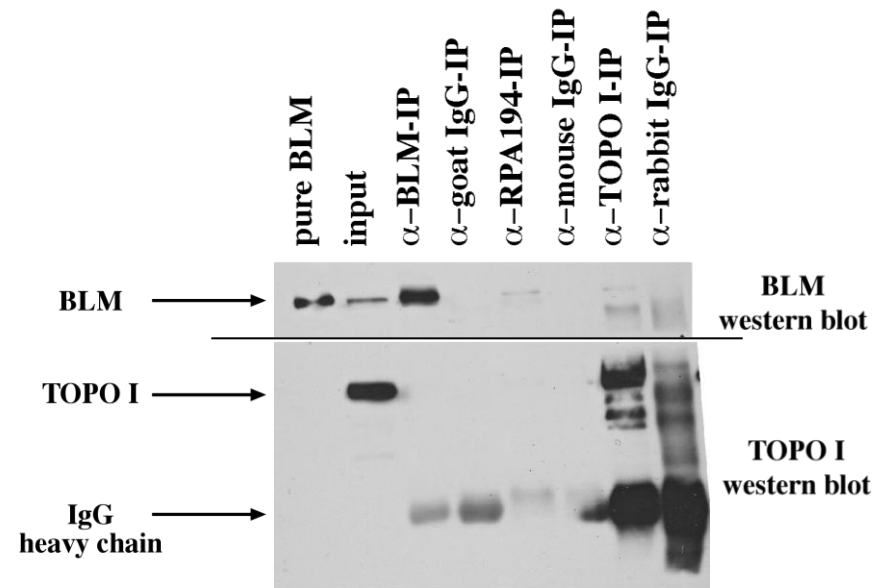

Supplementary Figure 1c

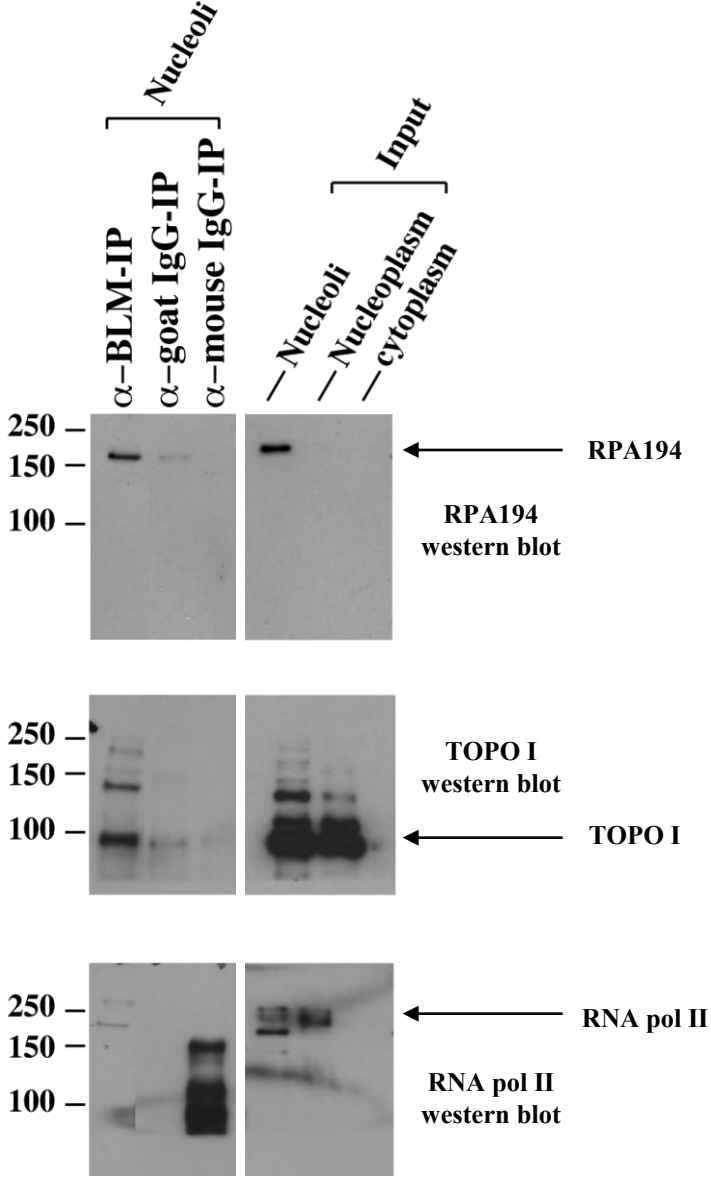

Supplementary Figure 2

Higher exposure

Lower exposure

|        |   |   |  | $\alpha$ -BLM-IP | $\alpha$ -TOPO I-IP | $\alpha$ -goat IgG-IP | $\alpha$ -rabbit IgG-IP | $\alpha$ -BLM-IP | $\alpha$ -BLM-IP |
|--------|---|---|--|------------------|---------------------|-----------------------|-------------------------|------------------|------------------|
| BSA    | - | - |  | -                | -                   | -                     | -                       | +                | +                |
| TOPO I | - | + |  | +                | +                   | +                     | +                       | -                | -                |
| BLM    | + | - |  | +                | +                   | +                     | +                       | +                | -                |

|        |   |   |  | $\alpha$ -BLM-IP | $\alpha$ -TOPO I-IP | $\alpha$ -goat IgG-IP | $\alpha$ -rabbit IgG-IP | $\alpha$ -BLM-IP | $\alpha$ -BLM-IP |
|--------|---|---|--|------------------|---------------------|-----------------------|-------------------------|------------------|------------------|
| BSA    | - | - |  | -                | -                   | -                     | -                       | +                | +                |
| TOPO I | - | + |  | +                | +                   | +                     | +                       | -                | -                |
| BLM    | + | - |  | +                | +                   | +                     | +                       | +                | -                |

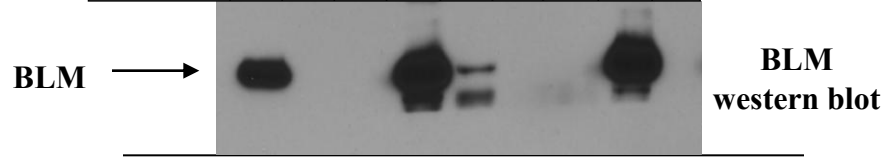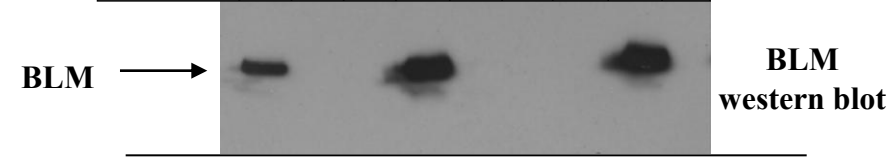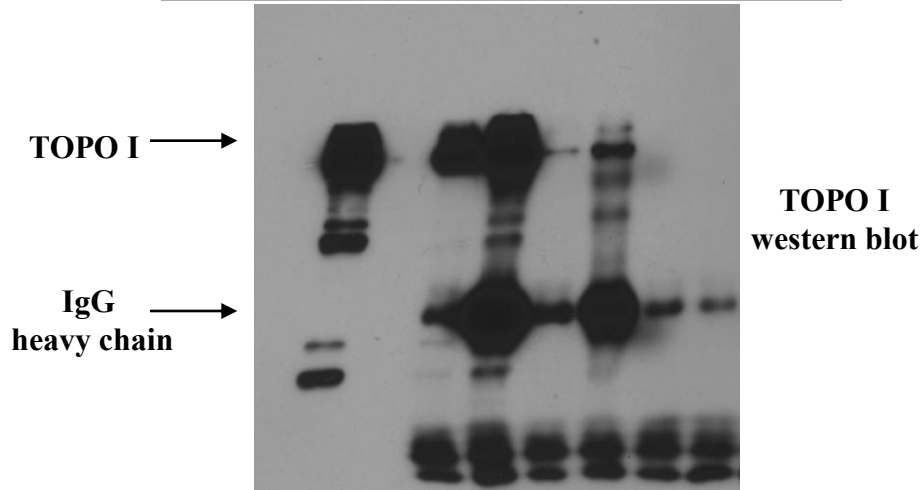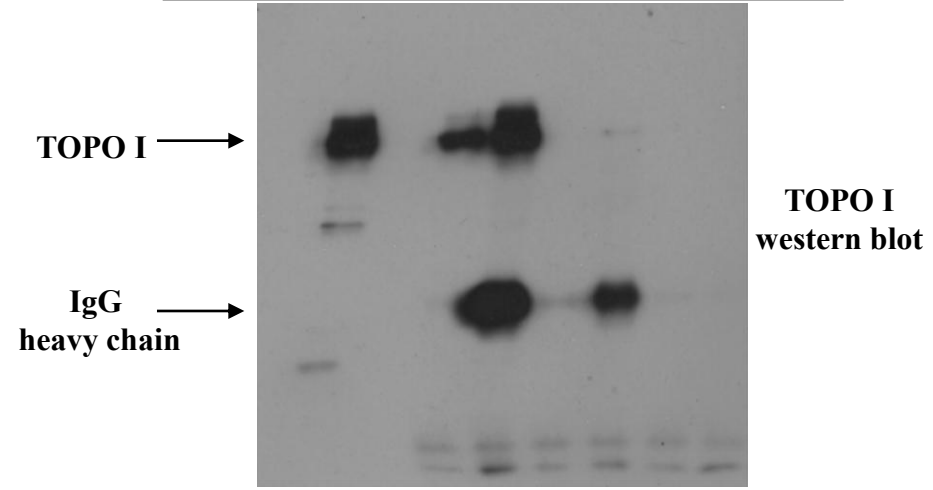

Supplementary Figure 3

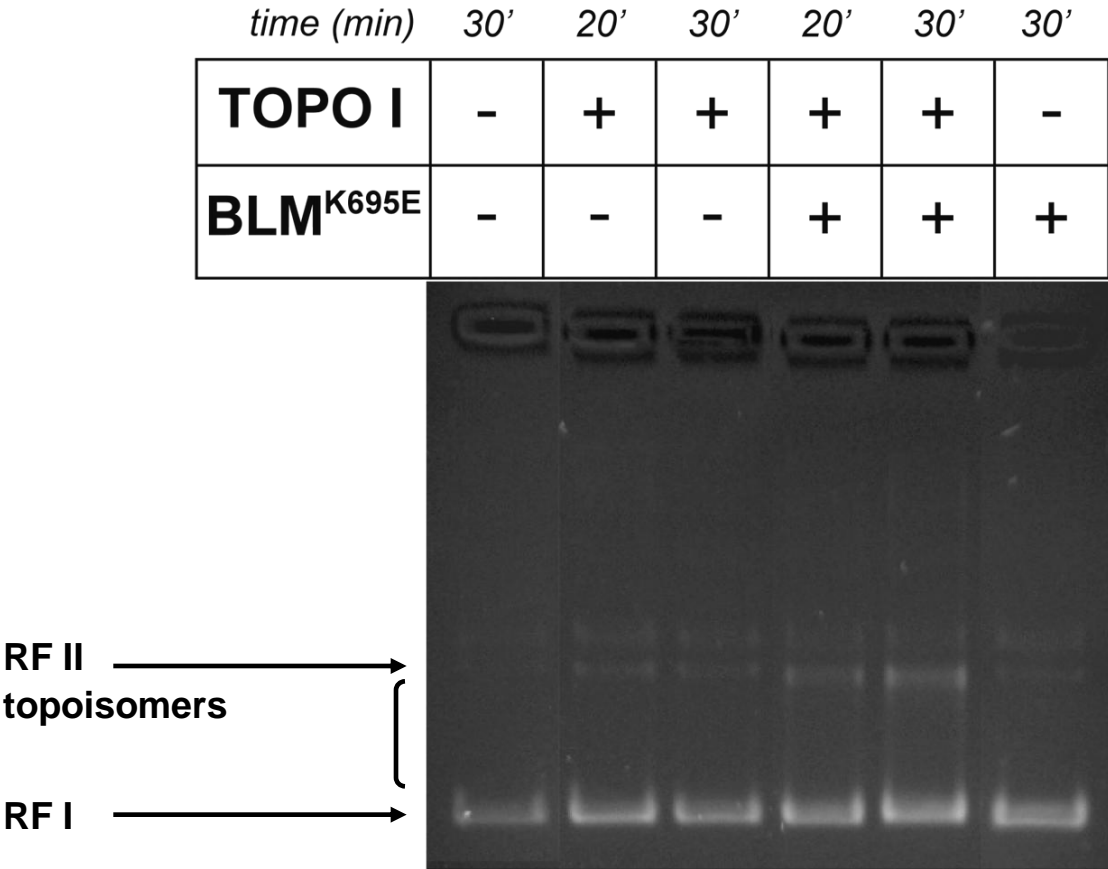

Supplement: NIHMS429957-supplement-01.pdf [file NIHMS429957-supplement-01.pdf]
